# Supplementary material for: A geopolymer membrane for application in a structural mechanics and energy storage difunctional supercapacitor
Source: Royal Society of Chemistry journal article supplement (doi:10.1039/d3cp03017b), 2023-01-01
Supplement: d3cp03017b1.pdf [file d3cp03017b1.pdf]

## Supplementary Information

# Geopolymer Membrane for Structural Mechanics and Energy Storage in Difunctional Supercapacitor Application

Jing-Lei Yang<sup>a</sup>, Wei-Bin Zhang<sup>\* a</sup>, Shan-Shan Chai<sup>a</sup>, Myat Myintzu Theint<sup>a, b</sup>, Yi Yin<sup>a</sup>, Ze-Qin Yang<sup>a</sup>, Jia-Jun Li<sup>a</sup>, Yu-Hui Yi<sup>a</sup>, Xue-Jing Ma<sup>\* a</sup>

<sup>a</sup> College of Materials and Chemistry & Chemical Engineering, Chengdu University of Technology, Chengdu 610059, China

<sup>b</sup> Mineral Development Section for International Relation, Department of Mines and Ministry of Natural Resources and Environmental, Nay Pyi Taw 15011, Myanmar

\* Corresponding Authors. E-mails: zhangweibin17@cdut.edu.cn; maxuejing17@cdut.edu.cn

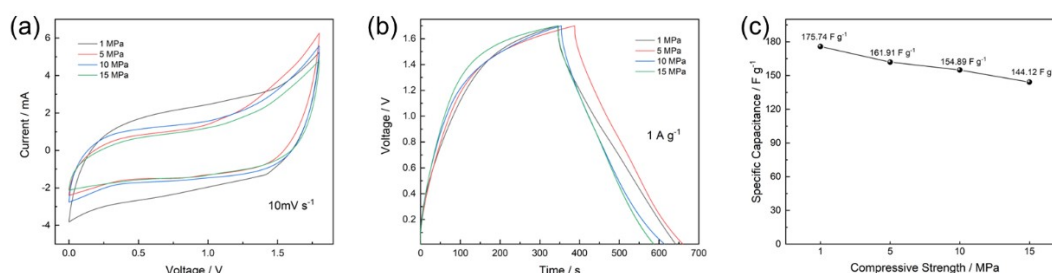

Fig. S1 The electrochemical performance varies with the change under different pressure. (a) Cyclic voltammetry curves at  $10\text{mV s}^{-1}$ , (b) Galvanostatic charge-discharge curves at  $1\text{A g}^{-1}$ , (c) The relationship between compressive strength and specific capacitance.

We use the best sample ( $160^{\circ}\text{C}$  24h) to study how electrochemical performance changes under different pressure, and the results are as Figure S1. We can see from S1(a), that the shape of the CV curve has not changed under different pressure, just a little change about the area. This corresponds to the changes in the GCD curve (S1(b)), and the specific capacitance can be calculated from GCD curve as S1(c). We can see that specific capacitance decreased with the pressure on the difunctional supercapacitors increased, this may be due to the electrolyte in the difunctional electrolyte being squeezed out of the difunctional supercapacitors as the pressure increased, and this will cause the fewer ions in the difunctional supercapacitor, inability to conduct sufficient redox reactions. Finally, will cause the decrease of specific capacitance.
